# Supplementary material for: Whole Genome Sequencing of Mycobacterium tuberculosis Clinical Isolates From India Reveals Genetic Heterogeneity and Region-Specific Variations That Might Affect Drug Susceptibility
Source: Front Microbiol. 2019 Feb 26;10:309. doi: 10.3389/fmicb.2019.00309 (PMC6399466; doi:10.3389/fmicb.2019.00309)
Supplement: TABLE S6 — List of novel SNVs associated with first- and second-line drug resistance identified in the study. [file Table_6.XLS]

## Sheet: Sheet1
Advani et al., 2018. Whole genome sequencing of Mycobacterium tuberculosis clinical isolates from India reveals genetic heterogeneity and region-specific variations that might affect drug susceptibility
Supplementary Table 6: List of novel SNVs associated with first and second line drug resistance identified in the study
Sample_ID	Category	Lineage	Strand	Position	Reference allele<->Alternate allele	Reference codon<->Alternate codon	Reference amino acid<->Alternate amino acid	Rv_ID	Gene_Symbol	SNV	Drug	Description
14509	Isoniazid mono-resistant	Indo-Oceanic	+	779474	G<->A	GGA<->GAA	G162E	Rv0678	Rv0678	Rv0678 G162E	BEDAQUILINE	hypothetical protein Rv0678
12067	MDR	Indo-Oceanic	+	779474	G<->A	GGA<->GAA	G162E	Rv0678	Rv0678	Rv0678 G162E	BEDAQUILINE	hypothetical protein Rv0678
14183	MDR	Indo-Oceanic	+	779474	G<->A	GGA<->GAA	G162E	Rv0678	Rv0678	Rv0678 G162E	BEDAQUILINE	hypothetical protein Rv0678
12970	MDR	East-African-Indian	+	779011	G<->A	GAT<->AAT	D8N	Rv0678	Rv0678	Rv0678 D8N	BEDAQUILINE	hypothetical protein Rv0678
14075	MDR	Indo-Oceanic	+	779474	G<->A	GGA<->GAA	G162E	Rv0678	Rv0678	Rv0678 G162E	BEDAQUILINE	hypothetical protein Rv0678
12970	MDR	East-African-Indian	+	779008	G<->T	GTC<->TTC	V7F	Rv0678	Rv0678	Rv0678 V7F	BEDAQUILINE	hypothetical protein Rv0678
PU-168	Pre-XDR	East-Asian (Beijing)	+	779154	A<->C	GAA<->GAC	E55D	Rv0678	Rv0678	Rv0678 E55D	BEDAQUILINE	hypothetical protein Rv0678
14105	Isoniazid mono-resistant	East-African-Indian	+	4241880	T<->C	CTG<->CCG	L673P	Rv3793	embC	embC L673P	ETHAMBUTOL	arabinosyltransferase C
14305	Isoniazid mono-resistant	East-African-Indian	+	4241880	T<->C	CTG<->CCG	L673P	Rv3793	embC	embC L673P	ETHAMBUTOL	arabinosyltransferase C
14737	Isoniazid mono-resistant	East-African-Indian	+	4241880	T<->C	CTG<->CCG	L673P	Rv3793	embC	embC L673P	ETHAMBUTOL	arabinosyltransferase C
PU-161	Isoniazid mono-resistant	East-African-Indian	-	1416213	G<->C	CAG<->GAG	Q379E	Rv1267c	embR	embR Q379E	ETHAMBUTOL	transcriptional regulator EmbR
13977	MDR	East-Asian (Beijing)	+	4241022	C<->T	GCT<->GTT	A387V	Rv3793	embC	embC A387V	ETHAMBUTOL	arabinosyltransferase C
14298	MDR	East-Asian (Beijing)	+	4241022	C<->T	GCT<->GTT	A387V	Rv3793	embC	embC A387V	ETHAMBUTOL	arabinosyltransferase C
8404	MDR	East-African-Indian	-	1416519	G<->A	CTC<->TTC	L277F	Rv1267c	embR	embR L277F	ETHAMBUTOL	transcriptional regulator EmbR
11078	MDR	East-African-Indian	-	1416519	G<->A	CTC<->TTC	L277F	Rv1267c	embR	embR L277F	ETHAMBUTOL	transcriptional regulator EmbR
13032	MDR	East-African-Indian	-	1416519	G<->A	CTC<->TTC	L277F	Rv1267c	embR	embR L277F	ETHAMBUTOL	transcriptional regulator EmbR
14141	MDR	Indo-Oceanic	+	4243644	G<->T	GCG<->TCG	A138S	Rv3794	embA	embA A138S	ETHAMBUTOL	arabinosyltransferase A
16131	MDR	Euro-American (H37Rv-like)	+	4243324	T<->C	GTT<->GCT	V31A	Rv3794	embA	embA V31A	ETHAMBUTOL	arabinosyltransferase A
P-18	MDR	East-African-Indian	+	4249772	G<->A	GGC<->AGC	G1087S	Rv3795	embB	embB G1087S	ETHAMBUTOL	arabinosyltransferase B
13075	MDR	East-African-Indian	+	4247535	C<->G	ACC<->AGC	T341S	Rv3795	embB	embB T341S	ETHAMBUTOL	arabinosyltransferase B
12584	MDR	East-African-Indian	-	1416519	G<->A	CTC<->TTC	L277F	Rv1267c	embR	embR L277F	ETHAMBUTOL	transcriptional regulator EmbR
13606	MDR	Euro-American	+	4243995	G<->A	GCA<->ACA	A255T	Rv3794	embA	embA A255T	ETHAMBUTOL	arabinosyltransferase A
12972	MDR	East-African-Indian	+	4243245	G<->C	GGT<->CGT	G5R	Rv3794	embA	embA G5R	ETHAMBUTOL	arabinosyltransferase A
P-9	MDR	Indo-Oceanic	+	4244244	A<->G	ATC<->GTC	I338V	Rv3794	embA	embA I338V	ETHAMBUTOL	arabinosyltransferase A
12972	MDR	East-African-Indian	+	4245153	A<->G	ATC<->GTC	I641V	Rv3794	embA	embA I641V	ETHAMBUTOL	arabinosyltransferase A
12972	MDR	East-African-Indian	+	4245198	C<->A	CTC<->ATC	L656I	Rv3794	embA	embA L656I	ETHAMBUTOL	arabinosyltransferase A
12972	MDR	East-African-Indian	+	4245224	T<->G	TAT<->TAG	Y664*	Rv3794	embA	embA Y664*	ETHAMBUTOL	arabinosyltransferase A
12972	MDR	East-African-Indian	+	4245222	T<->C	TAT<->CAT	Y664H	Rv3794	embA	embA Y664H	ETHAMBUTOL	arabinosyltransferase A
15437	MDR	East-African-Indian	+	4248738	C<->T	GCG<->GTG	A742V	Rv3795	embB	embB A742V	ETHAMBUTOL	arabinosyltransferase B
12972	MDR	East-African-Indian	+	4247940	T<->G	TTG<->TGG	L476W	Rv3795	embB	embB L476W	ETHAMBUTOL	arabinosyltransferase B
12970	MDR	East-African-Indian	+	4246544	A<->C	ACC<->CCC	T11P	Rv3795	embB	embB T11P	ETHAMBUTOL	arabinosyltransferase B
12696	MDR	East-Asian (Beijing)	+	4247880	T<->C	GTG<->GCG	V456A	Rv3795	embB	embB V456A	ETHAMBUTOL	arabinosyltransferase B
12807	MDR	Indo-Oceanic	+	4239893	G<->A	GCC<->ACC	A11T	Rv3793	embC	embC A11T	ETHAMBUTOL	arabinosyltransferase C
12972	MDR	East-African-Indian	+	4241453	A<->G	ATC<->GTC	I531V	Rv3793	embC	embC I531V	ETHAMBUTOL	arabinosyltransferase C
15331	MDR	East-African-Indian	+	4246985	T<->A	TTC<->ATC	F158I	Rv3795	embB	embB F158I	ETHAMBUTOL	arabinosyltransferase B
12890	MDR	East-African-Indian	+	4242262	G<->A	ATG<->ATA	M800I	Rv3793	embC	embC M800I	ETHAMBUTOL	arabinosyltransferase C
15348	MDR	East-African-Indian	+	4242262	G<->A	ATG<->ATA	M800I	Rv3793	embC	embC M800I	ETHAMBUTOL	arabinosyltransferase C
15798	Rifampicin mono-resistant	East-African-Indian	+	4244712	G<->T	GCC<->TCC	A494S	Rv3794	embA	embA A494S	ETHAMBUTOL	arabinosyltransferase A
15798	Rifampicin mono-resistant	East-African-Indian	+	4244726	C<->A	GAC<->GAA	D498E	Rv3794	embA	embA D498E	ETHAMBUTOL	arabinosyltransferase A
16340	Rifampicin mono-resistant	Indo-Oceanic	+	4246345	G<->A	CGC<->CAC	R1038H	Rv3794	embA	embA R1038H	ETHAMBUTOL	arabinosyltransferase A
14334	Rifampicin mono-resistant	East-African-Indian	+	4243378	G<->A	AGC<->AAC	S49N	Rv3794	embA	embA S49N	ETHAMBUTOL	arabinosyltransferase A
5553	Pre-XDR	East-Asian (Beijing)	+	4247880	T<->C	GTG<->GCG	V456A	Rv3795	embB	embB V456A	ETHAMBUTOL	arabinosyltransferase B
Oflo	Pre-XDR	East-Asian (Beijing)	+	4247880	T<->C	GTG<->GCG	V456A	Rv3795	embB	embB V456A	ETHAMBUTOL	arabinosyltransferase B
13011	Sensitive to first line drugs	East-African-Indian	+	4245465	C<->A	CCC<->ACC	P745T	Rv3794	embA	embA P745T	ETHAMBUTOL	arabinosyltransferase A
11610	Sensitive to first line drugs	East-African-Indian	+	4246243	A<->G	CAG<->CGG	Q1004R	Rv3794	embA	embA Q1004R	ETHAMBUTOL	arabinosyltransferase A
12668	Sensitive to first line drugs	East-African-Indian	+	4246243	A<->G	CAG<->CGG	Q1004R	Rv3794	embA	embA Q1004R	ETHAMBUTOL	arabinosyltransferase A
14388	Sensitive to first line drugs	East-African-Indian	+	4244946	G<->A	GTG<->ATG	V572M	Rv3794	embA	embA V572M	ETHAMBUTOL	arabinosyltransferase A
13742	Sensitive to first line drugs	Indo-Oceanic	+	4246829	G<->A	GGC<->AGC	G106S	Rv3795	embB	embB G106S	ETHAMBUTOL	arabinosyltransferase B
13742	Sensitive to first line drugs	Indo-Oceanic	+	4247337	C<->A	ACC<->AAC	T275N	Rv3795	embB	embB T275N	ETHAMBUTOL	arabinosyltransferase B
12863	Sensitive to first line drugs	Euro-American (X-type)	+	4248014	A<->C	ACG<->CCG	T501P	Rv3795	embB	embB T501P	ETHAMBUTOL	arabinosyltransferase B
13011	Sensitive to first line drugs	East-African-Indian	+	4241435	G<->A	GCC<->ACC	A525T	Rv3793	embC	embC A525T	ETHAMBUTOL	arabinosyltransferase C
13011	Sensitive to first line drugs	East-African-Indian	+	4240736	T<->G	TCC<->GCC	S292A	Rv3793	embC	embC S292A	ETHAMBUTOL	arabinosyltransferase C
13466	Isoniazid mono-resistant	East-African-Indian	-	4326039	G<->A	CGG<->TGG	R479W	Rv3854c	ethA	ethA R479W	ETHIONAMIDE	monooxygenase EthA
13058	Isoniazid mono-resistant	Euro-American (H37Rv-like)	+	4327864	G<->A	GGG<->AGG	G106R	Rv3855	ethR	ethR G106R	ETHIONAMIDE	HTH-type transcriptional repressor EthR
14275	Isoniazid mono-resistant	Euro-American (H37Rv-like)	+	4327864	G<->A	GGG<->AGG	G106R	Rv3855	ethR	ethR G106R	ETHIONAMIDE	HTH-type transcriptional repressor EthR
14240	MDR	East-Asian (Beijing)	-	4326735	C<->G	GCG<->CCG	A247P	Rv3854c	ethA	ethA A247P	ETHIONAMIDE	monooxygenase EthA
15926	MDR	East-Asian (Beijing)	-	4326735	C<->G	GCG<->CCG	A247P	Rv3854c	ethA	ethA A247P	ETHIONAMIDE	monooxygenase EthA
12973	MDR	East-African-Indian	-	4326431	A<->T	CTT<->CAT	L348H	Rv3854c	ethA	ethA L348H	ETHIONAMIDE	monooxygenase EthA
13075	MDR	East-African-Indian	-	4327186	C<->G	AGG<->AGC	R96S	Rv3854c	ethA	ethA R96S	ETHIONAMIDE	monooxygenase EthA
15453	MDR	East-African-Indian	-	4327058	C<->T	GGC<->GAC	G139D	Rv3854c	ethA	ethA G139D	ETHIONAMIDE	monooxygenase EthA
15324	MDR	Euro-American (H37Rv-like)	-	4326842	T<->C	TAC<->TGC	Y211C	Rv3854c	ethA	ethA Y211C	ETHIONAMIDE	monooxygenase EthA
12235	MDR	East-African-Indian	+	4328192	A<->T	AAC<->ATC	N215I	Rv3855	ethR	ethR N215I	ETHIONAMIDE	HTH-type transcriptional repressor EthR
13897	MDR	East-African-Indian	+	4328192	A<->T	AAC<->ATC	N215I	Rv3855	ethR	ethR N215I	ETHIONAMIDE	HTH-type transcriptional repressor EthR
14131	MDR	East-African-Indian	+	4328192	A<->T	AAC<->ATC	N215I	Rv3855	ethR	ethR N215I	ETHIONAMIDE	HTH-type transcriptional repressor EthR
13668	MDR	Indo-Oceanic	-	4327406	A<->C	CTG<->CGG	L23R	Rv3854c	ethA	ethA L23R	ETHIONAMIDE	monooxygenase EthA
14097	MDR	East-African-Indian	-	4327281	G<->A	CGA<->TGA	R65*	Rv3854c	ethA	ethA R65*	ETHIONAMIDE	monooxygenase EthA
12890	MDR	East-African-Indian	+	4328093	C<->T	ACG<->ATG	T182M	Rv3855	ethR	ethR T182M	ETHIONAMIDE	HTH-type transcriptional repressor EthR
15348	MDR	East-African-Indian	+	4328093	C<->T	ACG<->ATG	T182M	Rv3855	ethR	ethR T182M	ETHIONAMIDE	HTH-type transcriptional repressor EthR
12530	Rifampicin mono-resistant	East-African-Indian	-	4326070	G<->C	ATC<->ATG	I468M	Rv3854c	ethA	ethA I468M	ETHIONAMIDE	monooxygenase EthA
16340	Rifampicin mono-resistant	Indo-Oceanic	-	4326330	A<->T	TAC<->AAC	Y382N	Rv3854c	ethA	ethA Y382N	ETHIONAMIDE	monooxygenase EthA
13217	Rifampicin mono-resistant	East-African-Indian	+	4327691	A<->G	GAC<->GGC	D48G	Rv3855	ethR	ethR D48G	ETHIONAMIDE	HTH-type transcriptional repressor EthR
16371	Pre-XDR	East-Asian (Beijing)	-	4326905	A<->G	CTC<->CCC	L190P	Rv3854c	ethA	ethA L190P	ETHIONAMIDE	monooxygenase EthA
PU-168	Pre-XDR	East-Asian (Beijing)	-	4326676	G<->C	AGC<->AGG	S266R	Rv3854c	ethA	ethA S266R	ETHIONAMIDE	monooxygenase EthA
13059	Isoniazid mono-resistant	East-African-Indian	+	8836	C<->T	GCC<->GTC	A512V	Rv0006	gyrA	gyrA A512V	FLUOROQUINOLONES	DNA gyrase subunit A
16345	Isoniazid mono-resistant	East-African-Indian	+	8836	C<->T	GCC<->GTC	A512V	Rv0006	gyrA	gyrA A512V	FLUOROQUINOLONES	DNA gyrase subunit A
8548	Isoniazid mono-resistant	East-African-Indian	+	8056	G<->T	CGA<->CTA	R252L	Rv0006	gyrA	gyrA R252L	FLUOROQUINOLONES	DNA gyrase subunit A
16335	Isoniazid mono-resistant	East-African-Indian	+	6671	A<->C	ATA<->CTA	I517L	Rv0005	gyrB	gyrB I517L	FLUOROQUINOLONES	DNA gyrase subunit B
13569	Isoniazid mono-resistant	Indo-Oceanic	-	4405857	G<->T	GCC<->GAC	A212D	Rv3917c	parB	parB A212D	FLUOROQUINOLONES	chromosome partitioning protein ParB
12515	Isoniazid mono-resistant	East-African-Indian	-	4405639	G<->A	CCT<->TCT	P285S	Rv3917c	parB	parB P285S	FLUOROQUINOLONES	chromosome partitioning protein ParB
PU-154	Isoniazid mono-resistant	East-African-Indian	-	4405639	G<->A	CCT<->TCT	P285S	Rv3917c	parB	parB P285S	FLUOROQUINOLONES	chromosome partitioning protein ParB
PU-73	Isoniazid mono-resistant	Indo-Oceanic	-	2203704	T<->G	ATG<->CTG	M92L	Rv1959c	parE1	parE1 M92L	FLUOROQUINOLONES	toxin ParE1
14032	MDR	East-African-Indian	+	6150	T<->A	TTC<->TAC	F343Y	Rv0005	gyrB	gyrB F343Y	FLUOROQUINOLONES	DNA gyrase subunit B
14032	MDR	East-African-Indian	+	6158	A<->G	ACC<->GCC	T346A	Rv0005	gyrB	gyrB T346A	FLUOROQUINOLONES	DNA gyrase subunit B
PU-164	MDR	East-African-Indian	-	4405639	G<->A	CCT<->TCT	P285S	Rv3917c	parB	parB P285S	FLUOROQUINOLONES	chromosome partitioning protein ParB
16056	MDR	East-African-Indian	+	9724	A<->T	GAG<->GTG	E808V	Rv0006	gyrA	gyrA E808V	FLUOROQUINOLONES	DNA gyrase subunit A
PU-169	MDR	East-African-Indian	-	4407479	G<->A	TCG<->TTG	S18L	Rv3918c	parA	parA S18L	FLUOROQUINOLONES	chromosome partitioning protein ParA
13075	MDR	East-African-Indian	-	2203889	T<->C	CAG<->CGG	Q30R	Rv1959c	parE1	parE1 Q30R	FLUOROQUINOLONES	toxin ParE1
12972	MDR	East-African-Indian	+	8968	C<->G	GCG<->GGG	A556G	Rv0006	gyrA	gyrA A556G	FLUOROQUINOLONES	DNA gyrase subunit A
12972	MDR	East-African-Indian	+	8967	G<->C	GCG<->CCG	A556P	Rv0006	gyrA	gyrA A556P	FLUOROQUINOLONES	DNA gyrase subunit A
PU-65	MDR	Indo-Oceanic	+	7943	G<->T	GAG<->GAT	E214D	Rv0006	gyrA	gyrA E214D	FLUOROQUINOLONES	DNA gyrase subunit A
12972	MDR	East-African-Indian	+	8998	T<->G	TTG<->TGG	L566W	Rv0006	gyrA	gyrA L566W	FLUOROQUINOLONES	DNA gyrase subunit A
12972	MDR	East-African-Indian	+	9204	T<->A	TCC<->ACC	S635T	Rv0006	gyrA	gyrA S635T	FLUOROQUINOLONES	DNA gyrase subunit A
12972	MDR	East-African-Indian	+	9153	A<->G	ACC<->GCC	T618A	Rv0006	gyrA	gyrA T618A	FLUOROQUINOLONES	DNA gyrase subunit A
12972	MDR	East-African-Indian	+	9154	C<->A	ACC<->AAC	T618N	Rv0006	gyrA	gyrA T618N	FLUOROQUINOLONES	DNA gyrase subunit A
12972	MDR	East-African-Indian	+	9252	G<->A	GTC<->ATC	V651I	Rv0006	gyrA	gyrA V651I	FLUOROQUINOLONES	DNA gyrase subunit A
13627	MDR	East-African-Indian	+	5339	A<->G	ATT<->GTT	I73V	Rv0005	gyrB	gyrB I73V	FLUOROQUINOLONES	DNA gyrase subunit B
12972	MDR	East-African-Indian	+	6963	G<->A	CGC<->CAC	R614H	Rv0005	gyrB	gyrB R614H	FLUOROQUINOLONES	DNA gyrase subunit B
P-9	MDR	Indo-Oceanic	-	4406624	T<->C	AAG<->AGG	K303R	Rv3918c	parA	parA K303R	FLUOROQUINOLONES	chromosome partitioning protein ParA
13627	MDR	East-African-Indian	-	4405688	G<->C	CAC<->CAG	H268Q	Rv3917c	parB	parB H268Q	FLUOROQUINOLONES	chromosome partitioning protein ParB
12972	MDR	East-African-Indian	-	4406059	T<->C	AAT<->GAT	N145D	Rv3917c	parB	parB N145D	FLUOROQUINOLONES	chromosome partitioning protein ParB
13854	MDR	Euro-American	-	4406541	T<->C	AGC<->GGC	S331G	Rv3918c	parA	parA S331G	FLUOROQUINOLONES	chromosome partitioning protein ParA
15331	MDR	East-African-Indian	-	4405474	G<->A	CAC<->TAC	H340Y	Rv3917c	parB	parB H340Y	FLUOROQUINOLONES	chromosome partitioning protein ParB
15798	Rifampicin mono-resistant	East-African-Indian	+	7480	T<->A	TTC<->TAC	F60Y	Rv0006	gyrA	gyrA F60Y	FLUOROQUINOLONES	DNA gyrase subunit A
12530	Rifampicin mono-resistant	East-African-Indian	+	6986	T<->G	TCC<->GCC	S622A	Rv0005	gyrB	gyrB S622A	FLUOROQUINOLONES	DNA gyrase subunit B
12267	Rifampicin mono-resistant	East-African-Indian	-	4407416	T<->G	GAG<->GCG	E39A	Rv3918c	parA	parA E39A	FLUOROQUINOLONES	chromosome partitioning protein ParA
16340	Rifampicin mono-resistant	Indo-Oceanic	-	4407519	A<->C	TGG<->GGG	W5G	Rv3918c	parA	parA W5G	FLUOROQUINOLONES	chromosome partitioning protein ParA
13217	Rifampicin mono-resistant	East-African-Indian	-	4405650	G<->A	CCG<->CTG	P281L	Rv3917c	parB	parB P281L	FLUOROQUINOLONES	chromosome partitioning protein ParB
12530	Rifampicin mono-resistant	East-African-Indian	-	4405639	G<->A	CCT<->TCT	P285S	Rv3917c	parB	parB P285S	FLUOROQUINOLONES	chromosome partitioning protein ParB
13011	Sensitive to first line drugs	East-African-Indian	+	7569	G<->T	GCG<->TCG	A90S	Rv0006	gyrA	gyrA A90S	FLUOROQUINOLONES	DNA gyrase subunit A
13011	Sensitive to first line drugs	East-African-Indian	+	8253	A<->C	ATC<->CTC	I318L	Rv0006	gyrA	gyrA I318L	FLUOROQUINOLONES	DNA gyrase subunit A
13011	Sensitive to first line drugs	East-African-Indian	+	7730	G<->T	AGG<->AGT	R143S	Rv0006	gyrA	gyrA R143S	FLUOROQUINOLONES	DNA gyrase subunit A
13011	Sensitive to first line drugs	East-African-Indian	+	7506	A<->G	AGC<->GGC	S69G	Rv0006	gyrA	gyrA S69G	FLUOROQUINOLONES	DNA gyrase subunit A
15310	Sensitive to first line drugs	East-African-Indian	+	9252	G<->A	GTC<->ATC	V651I	Rv0006	gyrA	gyrA V651I	FLUOROQUINOLONES	DNA gyrase subunit A
13011	Sensitive to first line drugs	East-African-Indian	+	6110	A<->C	ATG<->CTG	M330L	Rv0005	gyrB	gyrB M330L	FLUOROQUINOLONES	DNA gyrase subunit B
12305	Sensitive to first line drugs	East-African-Indian	+	5187	C<->A	CCC<->CAC	P22H	Rv0005	gyrB	gyrB P22H	FLUOROQUINOLONES	DNA gyrase subunit B
13011	Sensitive to first line drugs	East-African-Indian	+	6203	A<->G	AGC<->GGC	S361G	Rv0005	gyrB	gyrB S361G	FLUOROQUINOLONES	DNA gyrase subunit B
13011	Sensitive to first line drugs	East-African-Indian	+	6205	C<->G	AGC<->AGG	S361R	Rv0005	gyrB	gyrB S361R	FLUOROQUINOLONES	DNA gyrase subunit B
13011	Sensitive to first line drugs	East-African-Indian	+	6204	G<->C	AGC<->ACC	S361T	Rv0005	gyrB	gyrB S361T	FLUOROQUINOLONES	DNA gyrase subunit B
14244	Sensitive to first line drugs	East-African-Indian	-	4407213	C<->A	GCC<->TCC	A107S	Rv3918c	parA	parA A107S	FLUOROQUINOLONES	chromosome partitioning protein ParA
13624	Sensitive to first line drugs	East-African-Indian	-	4405639	G<->A	CCT<->TCT	P285S	Rv3917c	parB	parB P285S	FLUOROQUINOLONES	chromosome partitioning protein ParB
16441	Sensitive to first line drugs	East-African-Indian	-	2204180	A<->C	TTC<->GTC	F16V	Rv1960c	parD1	parD1 F16V	FLUOROQUINOLONES	antitoxin ParD1
12161	Sensitive to first line drugs	East-African-Indian	-	2203889	T<->C	CAG<->CGG	Q30R	Rv1959c	parE1	parE1 Q30R	FLUOROQUINOLONES	toxin ParE1
13011	Sensitive to first line drugs	East-African-Indian	-	2203889	T<->C	CAG<->CGG	Q30R	Rv1959c	parE1	parE1 Q30R	FLUOROQUINOLONES	toxin ParE1
13059	Isoniazid mono-resistant	East-African-Indian	+	2516961	G<->T	GCC<->TCC	A59S	Rv2243	fabD	fabD A59S	ISONIAZID	malonyl CoA-acyl carrier protein transacylase
16345	Isoniazid mono-resistant	East-African-Indian	+	2516961	G<->T	GCC<->TCC	A59S	Rv2243	fabD	fabD A59S	ISONIAZID	malonyl CoA-acyl carrier protein transacylase
11867	Isoniazid mono-resistant	East-African-Indian	-	157333	C<->T	GAT<->AAT	D90N	Rv0129c	fbpC	fbpC D90N	ISONIAZID	diacylglycerol acyltransferase/mycolyltransferase Ag85C
14509	Isoniazid mono-resistant	Indo-Oceanic	+	411178	C<->G	GCC<->GGC	A114G	Rv0342	iniA	iniA A114G	ISONIAZID	isoniazid inductible protein IniA
14509	Isoniazid mono-resistant	Indo-Oceanic	+	412354	T<->G	CTT<->CGT	L506R	Rv0342	iniA	iniA L506R	ISONIAZID	isoniazid inductible protein IniA
12541	Isoniazid mono-resistant	East-African-Indian	+	411663	A<->C	AAC<->CAC	N276H	Rv0342	iniA	iniA N276H	ISONIAZID	isoniazid inductible protein IniA
13569	Isoniazid mono-resistant	Indo-Oceanic	+	413787	C<->A	GCG<->GAG	A344E	Rv0343	iniC	iniC A344E	ISONIAZID	iIsoniazid inductible protein IniC
PU-154	Isoniazid mono-resistant	East-African-Indian	-	2155538	C<->G	GAG<->CAG	E192Q	Rv1908c	katG	katG E192Q	ISONIAZID	catalase-peroxidase
13058	Isoniazid mono-resistant	Euro-American (H37Rv-like)	-	2153941	A<->G	TTC<->TCC	F724S	Rv1908c	katG	katG F724S	ISONIAZID	catalase-peroxidase
14275	Isoniazid mono-resistant	Euro-American (H37Rv-like)	-	2153941	A<->G	TTC<->TCC	F724S	Rv1908c	katG	katG F724S	ISONIAZID	catalase-peroxidase
13977	MDR	East-Asian (Beijing)	-	156666	T<->C	AAC<->AGC	N312S	Rv0129c	fbpC	fbpC N312S	ISONIAZID	diacylglycerol acyltransferase/mycolyltransferase Ag85C
14298	MDR	East-Asian (Beijing)	-	156666	T<->C	AAC<->AGC	N312S	Rv0129c	fbpC	fbpC N312S	ISONIAZID	diacylglycerol acyltransferase/mycolyltransferase Ag85C
14240	MDR	East-Asian (Beijing)	+	409666	G<->T	GGC<->GTC	G102V	Rv0341	iniB	iniB G102V	ISONIAZID	isoniazid inducible protein IniB
15926	MDR	East-Asian (Beijing)	+	409666	G<->T	GGC<->GTC	G102V	Rv0341	iniB	iniB G102V	ISONIAZID	isoniazid inducible protein IniB
14240	MDR	East-Asian (Beijing)	+	2518980	G<->C	AGG<->ACG	R289T	Rv2245	kasA	kasA R289T	ISONIAZID	3-oxoacyl-ACP synthase 1
15926	MDR	East-Asian (Beijing)	+	2518980	G<->C	AGG<->ACG	R289T	Rv2245	kasA	kasA R289T	ISONIAZID	3-oxoacyl-ACP synthase 1
PU-164	MDR	East-African-Indian	-	2155538	C<->G	GAG<->CAG	E192Q	Rv1908c	katG	katG E192Q	ISONIAZID	catalase-peroxidase
14032	MDR	East-African-Indian	-	2155643	T<->G	AAG<->CAG	K157Q	Rv1908c	katG	katG K157Q	ISONIAZID	catalase-peroxidase
14032	MDR	East-African-Indian	-	2155638	C<->G	AAG<->AAC	K158N	Rv1908c	katG	katG K158N	ISONIAZID	catalase-peroxidase
12973	MDR	East-African-Indian	-	2153916	C<->T	ATG<->ATA	M732I	Rv1908c	katG	katG M732I	ISONIAZID	catalase-peroxidase
14679	MDR	East-African-Indian	-	2153916	C<->T	ATG<->ATA	M732I	Rv1908c	katG	katG M732I	ISONIAZID	catalase-peroxidase
14845	MDR	East-African-Indian	-	157333	C<->T	GAT<->AAT	D90N	Rv0129c	fbpC	fbpC D90N	ISONIAZID	diacylglycerol acyltransferase/mycolyltransferase Ag85C
12067	MDR	Indo-Oceanic	+	411178	C<->G	GCC<->GGC	A114G	Rv0342	iniA	iniA A114G	ISONIAZID	isoniazid inductible protein IniA
14183	MDR	Indo-Oceanic	+	411178	C<->G	GCC<->GGC	A114G	Rv0342	iniA	iniA A114G	ISONIAZID	isoniazid inductible protein IniA
12969	MDR	East-African-Indian	+	411361	A<->C	GAT<->GCT	D175A	Rv0342	iniA	iniA D175A	ISONIAZID	isoniazid inductible protein IniA
12067	MDR	Indo-Oceanic	+	412354	T<->G	CTT<->CGT	L506R	Rv0342	iniA	iniA L506R	ISONIAZID	isoniazid inductible protein IniA
14183	MDR	Indo-Oceanic	+	412354	T<->G	CTT<->CGT	L506R	Rv0342	iniA	iniA L506R	ISONIAZID	isoniazid inductible protein IniA
14141	MDR	Indo-Oceanic	+	410661	A<->G	ACG<->GCG	T434A	Rv0341	iniB	iniB T434A	ISONIAZID	isoniazid inducible protein IniB
16131	MDR	Euro-American (H37Rv-like)	-	2154226	C<->G	GGT<->GCT	G629A	Rv1908c	katG	katG G629A	ISONIAZID	catalase-peroxidase
16131	MDR	Euro-American (H37Rv-like)	-	2153924	T<->C	AAG<->GAG	K730E	Rv1908c	katG	katG K730E	ISONIAZID	catalase-peroxidase
12972	MDR	East-African-Indian	+	2521887	T<->A	TTC<->TAC	F382Y	Rv2247	accD6	accD6 F382Y	ISONIAZID	acetyl-/propionyl-CoA carboxylase subunit beta
12972	MDR	East-African-Indian	+	2521115	A<->G	ATC<->GTC	I125V	Rv2247	accD6	accD6 I125V	ISONIAZID	acetyl-/propionyl-CoA carboxylase subunit beta
12972	MDR	East-African-Indian	+	2521404	G<->C	AGC<->ACC	S221T	Rv2247	accD6	accD6 S221T	ISONIAZID	acetyl-/propionyl-CoA carboxylase subunit beta
12972	MDR	East-African-Indian	+	2521553	G<->A	GTC<->ATC	V271I	Rv2247	accD6	accD6 V271I	ISONIAZID	acetyl-/propionyl-CoA carboxylase subunit beta
12972	MDR	East-African-Indian	+	2726638	C<->T	GCC<->GTC	A149V	Rv2428	ahpC	ahpC A149V	ISONIAZID	alkyl hydroperoxide reductase subunit AhpC
12972	MDR	East-African-Indian	+	2726669	T<->G	GAT<->GAG	D159E	Rv2428	ahpC	ahpC D159E	ISONIAZID	alkyl hydroperoxide reductase subunit AhpC
12972	MDR	East-African-Indian	+	1673890	G<->T	GCC<->TCC	A151S	Rv1483	fabG1	fabG1 A151S	ISONIAZID	3-oxoacyl-ACP reductase FabG
12972	MDR	East-African-Indian	+	1673941	G<->T	GCC<->TCC	A168S	Rv1483	fabG1	fabG1 A168S	ISONIAZID	3-oxoacyl-ACP reductase FabG
12972	MDR	East-African-Indian	+	1674079	C<->G	CCC<->GCC	P214A	Rv1483	fabG1	fabG1 P214A	ISONIAZID	3-oxoacyl-ACP reductase FabG
12972	MDR	East-African-Indian	+	1673905	T<->G	TCC<->GCC	S156A	Rv1483	fabG1	fabG1 S156A	ISONIAZID	3-oxoacyl-ACP reductase FabG
12972	MDR	East-African-Indian	+	1674136	T<->G	TCC<->GCC	S233A	Rv1483	fabG1	fabG1 S233A	ISONIAZID	3-oxoacyl-ACP reductase FabG
12972	MDR	East-African-Indian	+	1673917	G<->C	GTG<->CTG	V160L	Rv1483	fabG1	fabG1 V160L	ISONIAZID	3-oxoacyl-ACP reductase FabG
12972	MDR	East-African-Indian	-	157230	G<->C	ACC<->AGC	T124S	Rv0129c	fbpC	fbpC T124S	ISONIAZID	diacylglycerol acyltransferase/mycolyltransferase Ag85C
12972	MDR	East-African-Indian	-	157287	T<->A	TAC<->TTC	Y105F	Rv0129c	fbpC	fbpC Y105F	ISONIAZID	diacylglycerol acyltransferase/mycolyltransferase Ag85C
14075	MDR	Indo-Oceanic	+	411178	C<->G	GCC<->GGC	A114G	Rv0342	iniA	iniA A114G	ISONIAZID	isoniazid inductible protein IniA
12972	MDR	East-African-Indian	+	411298	A<->C	GAG<->GCG	E154A	Rv0342	iniA	iniA E154A	ISONIAZID	isoniazid inductible protein IniA
14075	MDR	Indo-Oceanic	+	412354	T<->G	CTT<->CGT	L506R	Rv0342	iniA	iniA L506R	ISONIAZID	isoniazid inductible protein IniA
12991	MDR	Indo-Oceanic	+	413678	G<->A	GAG<->AAG	E308K	Rv0343	iniC	iniC E308K	ISONIAZID	iIsoniazid inductible protein IniC
14128	MDR	Indo-Oceanic	+	413678	G<->A	GAG<->AAG	E308K	Rv0343	iniC	iniC E308K	ISONIAZID	iIsoniazid inductible protein IniC
12991	MDR	Indo-Oceanic	+	412778	C<->G	CGC<->GGC	R8G	Rv0343	iniC	iniC R8G	ISONIAZID	iIsoniazid inductible protein IniC
14128	MDR	Indo-Oceanic	+	412778	C<->G	CGC<->GGC	R8G	Rv0343	iniC	iniC R8G	ISONIAZID	iIsoniazid inductible protein IniC
12972	MDR	East-African-Indian	+	2518506	C<->A	GCG<->GAG	A131E	Rv2245	kasA	kasA A131E	ISONIAZID	3-oxoacyl-ACP synthase 1
14220	MDR	Indo-Oceanic	-	2102795	T<->C	CAG<->CGG	Q83R	Rv1854c	ndh	ndh Q83R	ISONIAZID	NADH dehydrogenase
13540	MDR	East-African-Indian	+	2518299	G<->C	GGT<->GCT	G62A	Rv2245	kasA	kasA G62A	ISONIAZID	3-oxoacyl-ACP synthase 1
15336	MDR	East-African-Indian	+	2518299	G<->C	GGT<->GCT	G62A	Rv2245	kasA	kasA G62A	ISONIAZID	3-oxoacyl-ACP synthase 1
15798	Rifampicin mono-resistant	East-African-Indian	+	2520950	G<->A	GTC<->ATC	V70I	Rv2247	accD6	accD6 V70I	ISONIAZID	acetyl-/propionyl-CoA carboxylase subunit beta
16340	Rifampicin mono-resistant	Indo-Oceanic	+	2517258	G<->A	GCC<->ACC	A158T	Rv2243	fabD	fabD A158T	ISONIAZID	malonyl CoA-acyl carrier protein transacylase
15798	Rifampicin mono-resistant	East-African-Indian	-	156984	G<->A	ACG<->ATG	T206M	Rv0129c	fbpC	fbpC T206M	ISONIAZID	diacylglycerol acyltransferase/mycolyltransferase Ag85C
14334	Rifampicin mono-resistant	East-African-Indian	-	2156589	A<->C	TCC<->GCC	S5A	Rv1909c	furA	furA S5A	ISONIAZID	ferric uptake regulation protein FurA
12649	Rifampicin mono-resistant	East-African-Indian	+	411879	A<->C	AAA<->CAA	K348Q	Rv0342	iniA	iniA K348Q	ISONIAZID	isoniazid inductible protein IniA
14231	Rifampicin mono-resistant	East-African-Indian	+	411213	C<->T	CCC<->TCC	P126S	Rv0342	iniA	iniA P126S	ISONIAZID	isoniazid inductible protein IniA
14231	Rifampicin mono-resistant	East-African-Indian	+	2519092	C<->G	ATC<->ATG	I326M	Rv2245	kasA	kasA I326M	ISONIAZID	3-oxoacyl-ACP synthase 1
14231	Rifampicin mono-resistant	East-African-Indian	-	2156008	T<->G	AAC<->ACC	N35T	Rv1908c	katG	katG N35T	ISONIAZID	catalase-peroxidase
13217	Rifampicin mono-resistant	East-African-Indian	-	2153915	T<->C	AAC<->GAC	N733D	Rv1908c	katG	katG N733D	ISONIAZID	catalase-peroxidase
16340	Rifampicin mono-resistant	Indo-Oceanic	-	2102240	C<->T	CGC<->CAC	R268H	Rv1854c	ndh	ndh R268H	ISONIAZID	NADH dehydrogenase
13719	Streptomycin mono-resistant	East-African-Indian	-	2153989	A<->T	GTC<->GAC	V708D	Rv1908c	katG	katG V708D	ISONIAZID	catalase-peroxidase
13011	Sensitive to first line drugs	East-African-Indian	+	2521269	C<->T	GCC<->GTC	A176V	Rv2247	accD6	accD6 A176V	ISONIAZID	acetyl-/propionyl-CoA carboxylase subunit beta
13011	Sensitive to first line drugs	East-African-Indian	+	2521351	C<->G	GAC<->GAG	D203E	Rv2247	accD6	accD6 D203E	ISONIAZID	acetyl-/propionyl-CoA carboxylase subunit beta
13011	Sensitive to first line drugs	East-African-Indian	+	2520975	A<->G	AAC<->AGC	N78S	Rv2247	accD6	accD6 N78S	ISONIAZID	acetyl-/propionyl-CoA carboxylase subunit beta
13011	Sensitive to first line drugs	East-African-Indian	+	2521209	G<->A	CGG<->CAG	R156Q	Rv2247	accD6	accD6 R156Q	ISONIAZID	acetyl-/propionyl-CoA carboxylase subunit beta
13011	Sensitive to first line drugs	East-African-Indian	+	2520962	A<->G	ACG<->GCG	T74A	Rv2247	accD6	accD6 T74A	ISONIAZID	acetyl-/propionyl-CoA carboxylase subunit beta
13011	Sensitive to first line drugs	East-African-Indian	+	2517118	C<->A	GCG<->GAG	A111E	Rv2243	fabD	fabD A111E	ISONIAZID	malonyl CoA-acyl carrier protein transacylase
13011	Sensitive to first line drugs	East-African-Indian	+	2517117	G<->A	GCG<->ACG	A111T	Rv2243	fabD	fabD A111T	ISONIAZID	malonyl CoA-acyl carrier protein transacylase
12518	Sensitive to first line drugs	East-African-Indian	-	157546	G<->A	CGC<->TGC	R19C	Rv0129c	fbpC	fbpC R19C	ISONIAZID	diacylglycerol acyltransferase/mycolyltransferase Ag85C
13011	Sensitive to first line drugs	East-African-Indian	+	1674656	G<->C	AGC<->ACC	S152T	Rv1484	inhA	inhA S152T	ISONIAZID	NADH-dependent enoyl
13526	Sensitive to first line drugs	East-African-Indian	-	2154590	T<->C	AAC<->GAC	N508D	Rv1908c	katG	katG N508D	ISONIAZID	catalase-peroxidase
13626	Sensitive to first line drugs	East-African-Indian	-	2154590	T<->C	AAC<->GAC	N508D	Rv1908c	katG	katG N508D	ISONIAZID	catalase-peroxidase
12023	Sensitive to first line drugs	East-African-Indian	-	2155059	C<->T	TGG<->TGA	W351*	Rv1908c	katG	katG W351*	ISONIAZID	catalase-peroxidase
15872	Sensitive to first line drugs	East-African-Indian	-	2155059	C<->T	TGG<->TGA	W351*	Rv1908c	katG	katG W351*	ISONIAZID	catalase-peroxidase
12023	Sensitive to first line drugs	East-African-Indian	-	2154876	C<->G	TGG<->TGC	W412C	Rv1908c	katG	katG W412C	ISONIAZID	catalase-peroxidase
16131	MDR	Euro-American (H37Rv-like)	-	2714523	A<->C	CAT<->CAG	H270Q	Rv2416c	eis	eis H270Q	KANAMYCIN	enhanced intracellular survival protein
P-9	MDR	Indo-Oceanic	-	2714753	G<->A	CAG<->TAG	Q194*	Rv2416c	eis	eis Q194*	KANAMYCIN	enhanced intracellular survival protein
12696	MDR	East-Asian (Beijing)	-	2714846	C<->T	GTC<->ATC	V163I	Rv2416c	eis	eis V163I	KANAMYCIN	enhanced intracellular survival protein
5553	Pre-XDR	East-Asian (Beijing)	-	2714846	C<->T	GTC<->ATC	V163I	Rv2416c	eis	eis V163I	KANAMYCIN	enhanced intracellular survival protein
Oflo	Pre-XDR	East-Asian (Beijing)	-	2714846	C<->T	GTC<->ATC	V163I	Rv2416c	eis	eis V163I	KANAMYCIN	enhanced intracellular survival protein
11610	Sensitive to first line drugs	East-African-Indian	-	2714605	G<->A	GCG<->GTG	A243V	Rv2416c	eis	eis A243V	KANAMYCIN	enhanced intracellular survival protein
12668	Sensitive to first line drugs	East-African-Indian	-	2714605	G<->A	GCG<->GTG	A243V	Rv2416c	eis	eis A243V	KANAMYCIN	enhanced intracellular survival protein
12033	Sensitive to first line drugs	Indo-Oceanic	-	2715016	C<->T	CGC<->CAC	R106H	Rv2416c	eis	eis R106H	KANAMYCIN	enhanced intracellular survival protein
12670	Sensitive to first line drugs	Indo-Oceanic	-	2715016	C<->T	CGC<->CAC	R106H	Rv2416c	eis	eis R106H	KANAMYCIN	enhanced intracellular survival protein
13675	Sensitive to first line drugs	East-African-Indian	-	2714449	C<->T	TGG<->TAG	W295*	Rv2416c	eis	eis W295*	KANAMYCIN	enhanced intracellular survival protein
16398	Sensitive to first line drugs	East-African-Indian	-	2714449	C<->T	TGG<->TAG	W295*	Rv2416c	eis	eis W295*	KANAMYCIN	enhanced intracellular survival protein
PU-73	Isoniazid mono-resistant	Indo-Oceanic	+	1918189	C<->G	CGG<->GGG	R84G	Rv1694	tlyA	tlyA R84G	KANAMYCIN/CAPREOMYCIN/AMIKACIN	16S/23S rRNA (cytidine-2\'-O)-methyltransferase TlyA
14984	Isoniazid mono-resistant	East-African-Indian	+	1918606	G<->C	GTC<->CTC	V223L	Rv1694	tlyA	tlyA V223L	KANAMYCIN/CAPREOMYCIN/AMIKACIN	16S/23S rRNA (cytidine-2\'-O)-methyltransferase TlyA
12890	MDR	East-African-Indian	+	1918636	C<->T	CCA<->TCA	P233S	Rv1694	tlyA	tlyA P233S	KANAMYCIN/CAPREOMYCIN/AMIKACIN	16S/23S rRNA (cytidine-2\'-O)-methyltransferase TlyA
15348	MDR	East-African-Indian	+	1918636	C<->T	CCA<->TCA	P233S	Rv1694	tlyA	tlyA P233S	KANAMYCIN/CAPREOMYCIN/AMIKACIN	16S/23S rRNA (cytidine-2\'-O)-methyltransferase TlyA
14231	Rifampicin mono-resistant	East-African-Indian	+	1918172	C<->T	GCG<->GTG	A78V	Rv1694	tlyA	tlyA A78V	KANAMYCIN/CAPREOMYCIN/AMIKACIN	16S/23S rRNA (cytidine-2\'-O)-methyltransferase TlyA
14985	Sensitive to first line drugs	East-African-Indian	+	1918606	G<->C	GTC<->CTC	V223L	Rv1694	tlyA	tlyA V223L	KANAMYCIN/CAPREOMYCIN/AMIKACIN	16S/23S rRNA (cytidine-2\'-O)-methyltransferase TlyA
13569	Isoniazid mono-resistant	Indo-Oceanic	-	3074311	G<->A	TCG<->TTG	S54L	Rv2764c	thyA	thyA S54L	PARA-AMINOSALISYLIC_ACID	thymidylate synthase ThyA
14240	MDR	East-Asian (Beijing)	-	2747504	T<->C	CAT<->CGT	H32R	Rv2447c	folC	folC H32R	PARA-AMINOSALISYLIC_ACID	folylpolyglutamate synthase FolC
15926	MDR	East-Asian (Beijing)	-	2747504	T<->C	CAT<->CGT	H32R	Rv2447c	folC	folC H32R	PARA-AMINOSALISYLIC_ACID	folylpolyglutamate synthase FolC
14240	MDR	East-Asian (Beijing)	-	2747504	T<->C	CAT<->CGT	H32R	Rv2447c	folC	folC H32R	PARA-AMINOSALISYLIC_ACID	folylpolyglutamate synthase FolC
15926	MDR	East-Asian (Beijing)	-	2747504	T<->C	CAT<->CGT	H32R	Rv2447c	folC	folC H32R	PARA-AMINOSALISYLIC_ACID	folylpolyglutamate synthase FolC
14236	MDR	East-African-Indian	-	2747213	G<->A	CCG<->CTG	P129L	Rv2447c	folC	folC P129L	PARA-AMINOSALISYLIC_ACID	folylpolyglutamate synthase FolC
14236	MDR	East-African-Indian	-	2747213	G<->A	CCG<->CTG	P129L	Rv2447c	folC	folC P129L	PARA-AMINOSALISYLIC_ACID	folylpolyglutamate synthase FolC
16268	MDR	Euro-American (H37Rv-like)	+	2987278	C<->T	GCG<->GTG	A147V	Rv2671	ribD	ribD A147V	PARA-AMINOSALISYLIC_ACID	bifunctional diaminohydroxyphosphoribosylaminopyrimidine deaminase/5-amino-6-(5-phosphoribosylamino)uracil reductase
12972	MDR	East-African-Indian	-	2747021	A<->G	GTC<->GCC	V193A	Rv2447c	folC	folC V193A	PARA-AMINOSALISYLIC_ACID	folylpolyglutamate synthase FolC
12972	MDR	East-African-Indian	-	2747021	A<->G	GTC<->GCC	V193A	Rv2447c	folC	folC V193A	PARA-AMINOSALISYLIC_ACID	folylpolyglutamate synthase FolC
12235	MDR	East-African-Indian	+	2987013	A<->G	AGC<->GGC	S59G	Rv2671	ribD	ribD S59G	PARA-AMINOSALISYLIC_ACID	bifunctional diaminohydroxyphosphoribosylaminopyrimidine deaminase/5-amino-6-(5-phosphoribosylamino)uracil reductase
13897	MDR	East-African-Indian	+	2987013	A<->G	AGC<->GGC	S59G	Rv2671	ribD	ribD S59G	PARA-AMINOSALISYLIC_ACID	bifunctional diaminohydroxyphosphoribosylaminopyrimidine deaminase/5-amino-6-(5-phosphoribosylamino)uracil reductase
14131	MDR	East-African-Indian	+	2987013	A<->G	AGC<->GGC	S59G	Rv2671	ribD	ribD S59G	PARA-AMINOSALISYLIC_ACID	bifunctional diaminohydroxyphosphoribosylaminopyrimidine deaminase/5-amino-6-(5-phosphoribosylamino)uracil reductase
12972	MDR	East-African-Indian	-	3074102	C<->T	GAT<->AAT	D124N	Rv2764c	thyA	thyA D124N	PARA-AMINOSALISYLIC_ACID	thymidylate synthase ThyA
12972	MDR	East-African-Indian	-	3074205	T<->A	GAA<->GAT	E89D	Rv2764c	thyA	thyA E89D	PARA-AMINOSALISYLIC_ACID	thymidylate synthase ThyA
12972	MDR	East-African-Indian	-	3074147	T<->C	ATC<->GTC	I109V	Rv2764c	thyA	thyA I109V	PARA-AMINOSALISYLIC_ACID	thymidylate synthase ThyA
PU-168	Pre-XDR	East-Asian (Beijing)	-	3073925	A<->C	TTG<->GTG	L183V	Rv2764c	thyA	thyA L183V	PARA-AMINOSALISYLIC_ACID	thymidylate synthase ThyA
13011	Sensitive to first line drugs	East-African-Indian	-	3074056	T<->G	GAG<->GCG	E139A	Rv2764c	thyA	thyA E139A	PARA-AMINOSALISYLIC_ACID	thymidylate synthase ThyA
13011	Sensitive to first line drugs	East-African-Indian	-	3074057	C<->G	GAG<->CAG	E139Q	Rv2764c	thyA	thyA E139Q	PARA-AMINOSALISYLIC_ACID	thymidylate synthase ThyA
11867	Isoniazid mono-resistant	East-African-Indian	-	2289024	A<->G	GTC<->GCC	V73A	Rv2043c	pncA	pncA V73A	PYRAZINAMIDE	pyrazinamidase/nicotinamidase PncA
14032	MDR	East-African-Indian	-	4044233	A<->G	TGC<->CGC	C17R	Rv3601c	panD	panD C17R	PYRAZINAMIDE	aspartate 1-decarboxylase
14032	MDR	East-African-Indian	-	4044231	G<->C	TGC<->TGG	C17W	Rv3601c	panD	panD C17W	PYRAZINAMIDE	aspartate 1-decarboxylase
14032	MDR	East-African-Indian	-	4044232	C<->T	TGC<->TAC	C17Y	Rv3601c	panD	panD C17Y	PYRAZINAMIDE	aspartate 1-decarboxylase
14032	MDR	East-African-Indian	+	1833734	G<->T	GCC<->TCC	A65S	Rv1630	rpsA	rpsA A65S	PYRAZINAMIDE	30S ribosomal protein S1
14032	MDR	East-African-Indian	+	1834309	C<->G	GAC<->GAG	D256E	Rv1630	rpsA	rpsA D256E	PYRAZINAMIDE	30S ribosomal protein S1
14032	MDR	East-African-Indian	+	1834307	G<->C	GAC<->CAC	D256H	Rv1630	rpsA	rpsA D256H	PYRAZINAMIDE	30S ribosomal protein S1
14032	MDR	East-African-Indian	+	1834333	C<->G	GAC<->GAG	D264E	Rv1630	rpsA	rpsA D264E	PYRAZINAMIDE	30S ribosomal protein S1
14032	MDR	East-African-Indian	+	1834043	G<->A	GAG<->AAG	E168K	Rv1630	rpsA	rpsA E168K	PYRAZINAMIDE	30S ribosomal protein S1
14032	MDR	East-African-Indian	+	1834486	G<->C	GAG<->GAC	E315D	Rv1630	rpsA	rpsA E315D	PYRAZINAMIDE	30S ribosomal protein S1
14032	MDR	East-African-Indian	+	1833794	G<->T	GAG<->TAG	E85*	Rv1630	rpsA	rpsA E85*	PYRAZINAMIDE	30S ribosomal protein S1
14032	MDR	East-African-Indian	+	1833795	A<->C	GAG<->GCG	E85A	Rv1630	rpsA	rpsA E85A	PYRAZINAMIDE	30S ribosomal protein S1
14032	MDR	East-African-Indian	+	1833796	G<->C	GAG<->GAC	E85D	Rv1630	rpsA	rpsA E85D	PYRAZINAMIDE	30S ribosomal protein S1
14032	MDR	East-African-Indian	+	1834046	A<->C	ATC<->CTC	I169L	Rv1630	rpsA	rpsA I169L	PYRAZINAMIDE	30S ribosomal protein S1
14032	MDR	East-African-Indian	+	1834427	A<->G	ATC<->GTC	I296V	Rv1630	rpsA	rpsA I296V	PYRAZINAMIDE	30S ribosomal protein S1
14032	MDR	East-African-Indian	+	1833653	A<->C	ATC<->CTC	I38L	Rv1630	rpsA	rpsA I38L	PYRAZINAMIDE	30S ribosomal protein S1
14032	MDR	East-African-Indian	+	1833668	A<->G	ATC<->GTC	I43V	Rv1630	rpsA	rpsA I43V	PYRAZINAMIDE	30S ribosomal protein S1
14032	MDR	East-African-Indian	+	1834040	A<->C	AAG<->CAG	K167Q	Rv1630	rpsA	rpsA K167Q	PYRAZINAMIDE	30S ribosomal protein S1
14032	MDR	East-African-Indian	+	1833959	C<->G	CTC<->GTC	L140V	Rv1630	rpsA	rpsA L140V	PYRAZINAMIDE	30S ribosomal protein S1
14032	MDR	East-African-Indian	+	1834453	G<->C	TTG<->TTC	L304F	Rv1630	rpsA	rpsA L304F	PYRAZINAMIDE	30S ribosomal protein S1
14032	MDR	East-African-Indian	+	1833770	A<->G	AAC<->GAC	N77D	Rv1630	rpsA	rpsA N77D	PYRAZINAMIDE	30S ribosomal protein S1
14032	MDR	East-African-Indian	+	1834298	C<->G	CAG<->GAG	Q253E	Rv1630	rpsA	rpsA Q253E	PYRAZINAMIDE	30S ribosomal protein S1
12058	MDR	East-African-Indian	+	1834347	G<->T	CGT<->CTT	R269L	Rv1630	rpsA	rpsA R269L	PYRAZINAMIDE	30S ribosomal protein S1
14032	MDR	East-African-Indian	+	1833782	T<->G	TCC<->GCC	S81A	Rv1630	rpsA	rpsA S81A	PYRAZINAMIDE	30S ribosomal protein S1
12599	MDR	East-African-Indian	-	2289098	C<->G	AAG<->AAC	K48N	Rv2043c	pncA	pncA K48N	PYRAZINAMIDE	pyrazinamidase/nicotinamidase PncA
13057	MDR	East-African-Indian	-	2289098	C<->G	AAG<->AAC	K48N	Rv2043c	pncA	pncA K48N	PYRAZINAMIDE	pyrazinamidase/nicotinamidase PncA
14845	MDR	East-African-Indian	-	2289024	A<->G	GTC<->GCC	V73A	Rv2043c	pncA	pncA V73A	PYRAZINAMIDE	pyrazinamidase/nicotinamidase PncA
12970	MDR	East-African-Indian	+	1834667	G<->T	GCG<->TCG	A376S	Rv1630	rpsA	rpsA A376S	PYRAZINAMIDE	30S ribosomal protein S1
12972	MDR	East-African-Indian	+	1834775	G<->A	GCC<->ACC	A412T	Rv1630	rpsA	rpsA A412T	PYRAZINAMIDE	30S ribosomal protein S1
12972	MDR	East-African-Indian	+	1834654	G<->C	GAG<->GAC	E371D	Rv1630	rpsA	rpsA E371D	PYRAZINAMIDE	30S ribosomal protein S1
12972	MDR	East-African-Indian	+	1834765	A<->C	GAA<->GAC	E408D	Rv1630	rpsA	rpsA E408D	PYRAZINAMIDE	30S ribosomal protein S1
12970	MDR	East-African-Indian	+	1834097	T<->A	TCC<->ACC	S186T	Rv1630	rpsA	rpsA S186T	PYRAZINAMIDE	30S ribosomal protein S1
12972	MDR	East-African-Indian	+	1833554	A<->G	ACC<->GCC	T5A	Rv1630	rpsA	rpsA T5A	PYRAZINAMIDE	30S ribosomal protein S1
15798	Rifampicin mono-resistant	East-African-Indian	+	1834667	G<->T	GCG<->TCG	A376S	Rv1630	rpsA	rpsA A376S	PYRAZINAMIDE	30S ribosomal protein S1
13011	Sensitive to first line drugs	East-African-Indian	+	1834520	G<->T	GCC<->TCC	A327S	Rv1630	rpsA	rpsA A327S	PYRAZINAMIDE	30S ribosomal protein S1
13011	Sensitive to first line drugs	East-African-Indian	+	1834667	G<->T	GCG<->TCG	A376S	Rv1630	rpsA	rpsA A376S	PYRAZINAMIDE	30S ribosomal protein S1
13011	Sensitive to first line drugs	East-African-Indian	+	1834098	C<->G	TCC<->TGC	S186C	Rv1630	rpsA	rpsA S186C	PYRAZINAMIDE	30S ribosomal protein S1
13011	Sensitive to first line drugs	East-African-Indian	+	1834097	T<->A	TCC<->ACC	S186T	Rv1630	rpsA	rpsA S186T	PYRAZINAMIDE	30S ribosomal protein S1
13011	Sensitive to first line drugs	East-African-Indian	+	1833554	A<->T	ACC<->TCC	T5S	Rv1630	rpsA	rpsA T5S	PYRAZINAMIDE	30S ribosomal protein S1
PU-161	Isoniazid mono-resistant	East-African-Indian	+	761751	G<->A	GCC<->ACC	A649T	Rv0667	rpoB	rpoB A649T	RIFAMPICIN	DNA-directed RNA polymerase subunit beta
13059	Isoniazid mono-resistant	East-African-Indian	+	762484	T<->G	CTG<->CGG	L893R	Rv0667	rpoB	rpoB L893R	RIFAMPICIN	DNA-directed RNA polymerase subunit beta
16345	Isoniazid mono-resistant	East-African-Indian	+	762484	T<->G	CTG<->CGG	L893R	Rv0667	rpoB	rpoB L893R	RIFAMPICIN	DNA-directed RNA polymerase subunit beta
11867	Isoniazid mono-resistant	East-African-Indian	+	760879	C<->T	CCG<->CTG	P358L	Rv0667	rpoB	rpoB P358L	RIFAMPICIN	DNA-directed RNA polymerase subunit beta
8548	Isoniazid mono-resistant	East-African-Indian	+	766710	G<->A	GGC<->GAC	G1114D	Rv0668	rpoC	rpoC G1114D	RIFAMPICIN	DNA-directed RNA polymerase subunit beta\'
12541	Isoniazid mono-resistant	East-African-Indian	+	764705	C<->A	CTG<->ATG	L446M	Rv0668	rpoC	rpoC L446M	RIFAMPICIN	DNA-directed RNA polymerase subunit beta\'
12541	Isoniazid mono-resistant	East-African-Indian	+	764706	T<->A	CTG<->CAG	L446Q	Rv0668	rpoC	rpoC L446Q	RIFAMPICIN	DNA-directed RNA polymerase subunit beta\'
14032	MDR	East-African-Indian	+	762273	G<->T	GCC<->TCC	A823S	Rv0667	rpoB	rpoB A823S	RIFAMPICIN	DNA-directed RNA polymerase subunit beta
14032	MDR	East-African-Indian	+	762015	G<->T	GAA<->TAA	E737*	Rv0667	rpoB	rpoB E737*	RIFAMPICIN	DNA-directed RNA polymerase subunit beta
14032	MDR	East-African-Indian	+	762016	A<->C	GAA<->GCA	E737A	Rv0667	rpoB	rpoB E737A	RIFAMPICIN	DNA-directed RNA polymerase subunit beta
14032	MDR	East-African-Indian	+	762017	A<->C	GAA<->GAC	E737D	Rv0667	rpoB	rpoB E737D	RIFAMPICIN	DNA-directed RNA polymerase subunit beta
14032	MDR	East-African-Indian	+	762020	G<->C	GAG<->GAC	E738D	Rv0667	rpoB	rpoB E738D	RIFAMPICIN	DNA-directed RNA polymerase subunit beta
14032	MDR	East-African-Indian	+	762475	G<->C	GGC<->GCC	G890A	Rv0667	rpoB	rpoB G890A	RIFAMPICIN	DNA-directed RNA polymerase subunit beta
14032	MDR	East-African-Indian	+	762474	G<->T	GGC<->TGC	G890C	Rv0667	rpoB	rpoB G890C	RIFAMPICIN	DNA-directed RNA polymerase subunit beta
14032	MDR	East-African-Indian	+	761974	A<->T	CAC<->CTC	H723L	Rv0667	rpoB	rpoB H723L	RIFAMPICIN	DNA-directed RNA polymerase subunit beta
14032	MDR	East-African-Indian	+	762051	C<->T	CAT<->TAT	H749Y	Rv0667	rpoB	rpoB H749Y	RIFAMPICIN	DNA-directed RNA polymerase subunit beta
14032	MDR	East-African-Indian	+	762878	C<->G	ATC<->ATG	I1024M	Rv0667	rpoB	rpoB I1024M	RIFAMPICIN	DNA-directed RNA polymerase subunit beta
14032	MDR	East-African-Indian	+	762057	A<->G	ATC<->GTC	I751V	Rv0667	rpoB	rpoB I751V	RIFAMPICIN	DNA-directed RNA polymerase subunit beta
14032	MDR	East-African-Indian	+	762116	C<->G	ATC<->ATG	I770M	Rv0667	rpoB	rpoB I770M	RIFAMPICIN	DNA-directed RNA polymerase subunit beta
14032	MDR	East-African-Indian	+	762114	A<->G	ATC<->GTC	I770V	Rv0667	rpoB	rpoB I770V	RIFAMPICIN	DNA-directed RNA polymerase subunit beta
14032	MDR	East-African-Indian	+	762009	C<->A	CTG<->ATG	L735M	Rv0667	rpoB	rpoB L735M	RIFAMPICIN	DNA-directed RNA polymerase subunit beta
14032	MDR	East-African-Indian	+	762813	A<->C	ATG<->CTG	M1003L	Rv0667	rpoB	rpoB M1003L	RIFAMPICIN	DNA-directed RNA polymerase subunit beta
14032	MDR	East-African-Indian	+	762814	T<->C	ATG<->ACG	M1003T	Rv0667	rpoB	rpoB M1003T	RIFAMPICIN	DNA-directed RNA polymerase subunit beta
14032	MDR	East-African-Indian	+	762879	A<->C	ATG<->CTG	M1025L	Rv0667	rpoB	rpoB M1025L	RIFAMPICIN	DNA-directed RNA polymerase subunit beta
14032	MDR	East-African-Indian	+	762003	A<->C	AAC<->CAC	N733H	Rv0667	rpoB	rpoB N733H	RIFAMPICIN	DNA-directed RNA polymerase subunit beta
14032	MDR	East-African-Indian	+	762005	C<->G	AAC<->AAG	N733K	Rv0667	rpoB	rpoB N733K	RIFAMPICIN	DNA-directed RNA polymerase subunit beta
14032	MDR	East-African-Indian	+	762832	G<->C	AGC<->ACC	S1009T	Rv0667	rpoB	rpoB S1009T	RIFAMPICIN	DNA-directed RNA polymerase subunit beta
8404	MDR	East-African-Indian	+	761550	T<->G	TCG<->GCG	S582A	Rv0667	rpoB	rpoB S582A	RIFAMPICIN	DNA-directed RNA polymerase subunit beta
11078	MDR	East-African-Indian	+	761550	T<->G	TCG<->GCG	S582A	Rv0667	rpoB	rpoB S582A	RIFAMPICIN	DNA-directed RNA polymerase subunit beta
14032	MDR	East-African-Indian	+	762858	A<->T	ACG<->TCG	T1018S	Rv0667	rpoB	rpoB T1018S	RIFAMPICIN	DNA-directed RNA polymerase subunit beta
14032	MDR	East-African-Indian	+	762855	G<->A	GTC<->ATC	V1017I	Rv0667	rpoB	rpoB V1017I	RIFAMPICIN	DNA-directed RNA polymerase subunit beta
12058	MDR	East-African-Indian	+	760929	G<->C	GTC<->CTC	V375L	Rv0667	rpoB	rpoB V375L	RIFAMPICIN	DNA-directed RNA polymerase subunit beta
14032	MDR	East-African-Indian	+	762849	T<->G	TAC<->GAC	Y1015D	Rv0667	rpoB	rpoB Y1015D	RIFAMPICIN	DNA-directed RNA polymerase subunit beta
14032	MDR	East-African-Indian	+	763925	G<->T	GCC<->TCC	A186S	Rv0668	rpoC	rpoC A186S	RIFAMPICIN	DNA-directed RNA polymerase subunit beta\'
14032	MDR	East-African-Indian	+	763622	G<->T	GCC<->TCC	A85S	Rv0668	rpoC	rpoC A85S	RIFAMPICIN	DNA-directed RNA polymerase subunit beta\'
14032	MDR	East-African-Indian	+	763916	G<->A	GAG<->AAG	E183K	Rv0668	rpoC	rpoC E183K	RIFAMPICIN	DNA-directed RNA polymerase subunit beta\'
14032	MDR	East-African-Indian	+	764117	G<->C	GAG<->CAG	E250Q	Rv0668	rpoC	rpoC E250Q	RIFAMPICIN	DNA-directed RNA polymerase subunit beta\'
14032	MDR	East-African-Indian	+	763639	G<->C	GAG<->GAC	E90D	Rv0668	rpoC	rpoC E90D	RIFAMPICIN	DNA-directed RNA polymerase subunit beta\'
14032	MDR	East-African-Indian	+	763751	A<->G	ATC<->GTC	I128V	Rv0668	rpoC	rpoC I128V	RIFAMPICIN	DNA-directed RNA polymerase subunit beta\'
14032	MDR	East-African-Indian	+	763589	A<->G	ATC<->GTC	I74V	Rv0668	rpoC	rpoC I74V	RIFAMPICIN	DNA-directed RNA polymerase subunit beta\'
14032	MDR	East-African-Indian	+	763517	A<->C	AAG<->CAG	K50Q	Rv0668	rpoC	rpoC K50Q	RIFAMPICIN	DNA-directed RNA polymerase subunit beta\'
14032	MDR	East-African-Indian	+	763518	A<->G	AAG<->AGG	K50R	Rv0668	rpoC	rpoC K50R	RIFAMPICIN	DNA-directed RNA polymerase subunit beta\'
14032	MDR	East-African-Indian	+	764389	G<->C	TTG<->TTC	L340F	Rv0668	rpoC	rpoC L340F	RIFAMPICIN	DNA-directed RNA polymerase subunit beta\'
14032	MDR	East-African-Indian	+	764582	C<->A	CTG<->ATG	L405M	Rv0668	rpoC	rpoC L405M	RIFAMPICIN	DNA-directed RNA polymerase subunit beta\'
14032	MDR	East-African-Indian	+	764706	T<->A	CTG<->CAG	L446Q	Rv0668	rpoC	rpoC L446Q	RIFAMPICIN	DNA-directed RNA polymerase subunit beta\'
14032	MDR	East-African-Indian	+	764407	G<->C	AGG<->AGC	R346S	Rv0668	rpoC	rpoC R346S	RIFAMPICIN	DNA-directed RNA polymerase subunit beta\'
14032	MDR	East-African-Indian	+	764780	A<->T	AGC<->TGC	S471C	Rv0668	rpoC	rpoC S471C	RIFAMPICIN	DNA-directed RNA polymerase subunit beta\'
14032	MDR	East-African-Indian	+	764781	G<->C	AGC<->ACC	S471T	Rv0668	rpoC	rpoC S471T	RIFAMPICIN	DNA-directed RNA polymerase subunit beta\'
12036	MDR	East-African-Indian	+	766485	T<->G	GTA<->GGA	V1039G	Rv0668	rpoC	rpoC V1039G	RIFAMPICIN	DNA-directed RNA polymerase subunit beta\'
12492	MDR	East-African-Indian	+	766485	T<->G	GTA<->GGA	V1039G	Rv0668	rpoC	rpoC V1039G	RIFAMPICIN	DNA-directed RNA polymerase subunit beta\'
14032	MDR	East-African-Indian	+	766485	T<->G	GTA<->GGA	V1039G	Rv0668	rpoC	rpoC V1039G	RIFAMPICIN	DNA-directed RNA polymerase subunit beta\'
14232	MDR	East-African-Indian	+	766485	T<->G	GTA<->GGA	V1039G	Rv0668	rpoC	rpoC V1039G	RIFAMPICIN	DNA-directed RNA polymerase subunit beta\'
14032	MDR	East-African-Indian	+	763772	G<->A	GTG<->ATG	V135M	Rv0668	rpoC	rpoC V135M	RIFAMPICIN	DNA-directed RNA polymerase subunit beta\'
14032	MDR	East-African-Indian	+	766361	G<->A	GTG<->ATG	V998M	Rv0668	rpoC	rpoC V998M	RIFAMPICIN	DNA-directed RNA polymerase subunit beta\'
14032	MDR	East-African-Indian	+	763550	T<->G	TAC<->GAC	Y61D	Rv0668	rpoC	rpoC Y61D	RIFAMPICIN	DNA-directed RNA polymerase subunit beta\'
14032	MDR	East-African-Indian	+	763551	A<->C	TAC<->TCC	Y61S	Rv0668	rpoC	rpoC Y61S	RIFAMPICIN	DNA-directed RNA polymerase subunit beta\'
13032	MDR	East-African-Indian	+	765915	A<->C	TAC<->TCC	Y849S	Rv0668	rpoC	rpoC Y849S	RIFAMPICIN	DNA-directed RNA polymerase subunit beta\'
14141	MDR	Indo-Oceanic	+	760835	C<->G	CAC<->CAG	H343Q	Rv0667	rpoB	rpoB H343Q	RIFAMPICIN	DNA-directed RNA polymerase subunit beta
P-18	MDR	East-African-Indian	+	760645	C<->T	CCC<->CTC	P280L	Rv0667	rpoB	rpoB P280L	RIFAMPICIN	DNA-directed RNA polymerase subunit beta
14845	MDR	East-African-Indian	+	760879	C<->T	CCG<->CTG	P358L	Rv0667	rpoB	rpoB P358L	RIFAMPICIN	DNA-directed RNA polymerase subunit beta
PU-169	MDR	East-African-Indian	+	764667	G<->C	GGC<->GCC	G433A	Rv0668	rpoC	rpoC G433A	RIFAMPICIN	DNA-directed RNA polymerase subunit beta\'
16131	MDR	Euro-American (H37Rv-like)	+	764169	A<->C	AAC<->ACC	N267T	Rv0668	rpoC	rpoC N267T	RIFAMPICIN	DNA-directed RNA polymerase subunit beta\'
14220	MDR	Indo-Oceanic	+	763216	C<->T	GCG<->GTG	A1137V	Rv0667	rpoB	rpoB A1137V	RIFAMPICIN	DNA-directed RNA polymerase subunit beta
12972	MDR	East-African-Indian	+	762362	G<->C	GAG<->GAC	E852D	Rv0667	rpoB	rpoB E852D	RIFAMPICIN	DNA-directed RNA polymerase subunit beta
15437	MDR	East-African-Indian	+	761575	T<->A	TTC<->TAC	F590Y	Rv0667	rpoB	rpoB F590Y	RIFAMPICIN	DNA-directed RNA polymerase subunit beta
12970	MDR	East-African-Indian	+	763203	T<->G	TCG<->GCG	S1133A	Rv0667	rpoB	rpoB S1133A	RIFAMPICIN	DNA-directed RNA polymerase subunit beta
12970	MDR	East-African-Indian	+	763207	G<->A	AGT<->AAT	S1134N	Rv0667	rpoB	rpoB S1134N	RIFAMPICIN	DNA-directed RNA polymerase subunit beta
12970	MDR	East-African-Indian	+	763208	T<->G	AGT<->AGG	S1134R	Rv0667	rpoB	rpoB S1134R	RIFAMPICIN	DNA-directed RNA polymerase subunit beta
12972	MDR	East-African-Indian	+	760522	G<->A	AGC<->AAC	S239N	Rv0667	rpoB	rpoB S239N	RIFAMPICIN	DNA-directed RNA polymerase subunit beta
16055	MDR	East-Asian (Beijing)	+	761002	C<->T	ACC<->ATC	T399I	Rv0667	rpoB	rpoB T399I	RIFAMPICIN	DNA-directed RNA polymerase subunit beta
12972	MDR	East-African-Indian	+	760591	T<->C	GTC<->GCC	V262A	Rv0667	rpoB	rpoB V262A	RIFAMPICIN	DNA-directed RNA polymerase subunit beta
P-9	MDR	Indo-Oceanic	+	767007	C<->A	GCG<->GAG	A1213E	Rv0668	rpoC	rpoC A1213E	RIFAMPICIN	DNA-directed RNA polymerase subunit beta\'
12970	MDR	East-African-Indian	+	765453	C<->T	GCC<->GTC	A695V	Rv0668	rpoC	rpoC A695V	RIFAMPICIN	DNA-directed RNA polymerase subunit beta\'
12972	MDR	East-African-Indian	+	766274	G<->A	GCC<->ACC	A969T	Rv0668	rpoC	rpoC A969T	RIFAMPICIN	DNA-directed RNA polymerase subunit beta\'
12972	MDR	East-African-Indian	+	765753	A<->C	GAC<->GCC	D795A	Rv0668	rpoC	rpoC D795A	RIFAMPICIN	DNA-directed RNA polymerase subunit beta\'
12972	MDR	East-African-Indian	+	763876	A<->C	GAA<->GAC	E169D	Rv0668	rpoC	rpoC E169D	RIFAMPICIN	DNA-directed RNA polymerase subunit beta\'
12972	MDR	East-African-Indian	+	765326	C<->G	CAC<->GAC	H653D	Rv0668	rpoC	rpoC H653D	RIFAMPICIN	DNA-directed RNA polymerase subunit beta\'
12970	MDR	East-African-Indian	+	764913	T<->A	ATG<->AAG	M515K	Rv0668	rpoC	rpoC M515K	RIFAMPICIN	DNA-directed RNA polymerase subunit beta\'
12970	MDR	East-African-Indian	+	764912	A<->C	ATG<->CTG	M515L	Rv0668	rpoC	rpoC M515L	RIFAMPICIN	DNA-directed RNA polymerase subunit beta\'
12972	MDR	East-African-Indian	+	765383	A<->C	ATG<->CTG	M672L	Rv0668	rpoC	rpoC M672L	RIFAMPICIN	DNA-directed RNA polymerase subunit beta\'
12972	MDR	East-African-Indian	+	766043	C<->G	CAG<->GAG	Q892E	Rv0668	rpoC	rpoC Q892E	RIFAMPICIN	DNA-directed RNA polymerase subunit beta\'
12972	MDR	East-African-Indian	+	764652	C<->G	TCG<->TGG	S428W	Rv0668	rpoC	rpoC S428W	RIFAMPICIN	DNA-directed RNA polymerase subunit beta\'
12972	MDR	East-African-Indian	+	766280	A<->G	AGC<->GGC	S971G	Rv0668	rpoC	rpoC S971G	RIFAMPICIN	DNA-directed RNA polymerase subunit beta\'
12235	MDR	East-African-Indian	+	765113	G<->T	GTG<->TTG	V582L	Rv0668	rpoC	rpoC V582L	RIFAMPICIN	DNA-directed RNA polymerase subunit beta\'
13897	MDR	East-African-Indian	+	765113	G<->T	GTG<->TTG	V582L	Rv0668	rpoC	rpoC V582L	RIFAMPICIN	DNA-directed RNA polymerase subunit beta\'
14131	MDR	East-African-Indian	+	765113	G<->T	GTG<->TTG	V582L	Rv0668	rpoC	rpoC V582L	RIFAMPICIN	DNA-directed RNA polymerase subunit beta\'
13122	MDR	East-African-Indian	+	761407	T<->A	GTG<->GAG	V534E	Rv0667	rpoB	rpoB V534E	RIFAMPICIN	DNA-directed RNA polymerase subunit beta
15798	Rifampicin mono-resistant	East-African-Indian	+	761367	G<->C	GAG<->CAG	E521Q	Rv0667	rpoB	rpoB E521Q	RIFAMPICIN	DNA-directed RNA polymerase subunit beta
15798	Rifampicin mono-resistant	East-African-Indian	+	762114	A<->G	ATC<->GTC	I770V	Rv0667	rpoB	rpoB I770V	RIFAMPICIN	DNA-directed RNA polymerase subunit beta
15798	Rifampicin mono-resistant	East-African-Indian	+	761362	G<->C	AGC<->ACC	S519T	Rv0667	rpoB	rpoB S519T	RIFAMPICIN	DNA-directed RNA polymerase subunit beta
13217	Rifampicin mono-resistant	East-African-Indian	+	766196	G<->A	GAC<->AAC	D943N	Rv0668	rpoC	rpoC D943N	RIFAMPICIN	DNA-directed RNA polymerase subunit beta\'
15798	Rifampicin mono-resistant	East-African-Indian	+	765385	G<->C	ATG<->ATC	M672I	Rv0668	rpoC	rpoC M672I	RIFAMPICIN	DNA-directed RNA polymerase subunit beta\'
15798	Rifampicin mono-resistant	East-African-Indian	+	765383	A<->C	ATG<->CTG	M672L	Rv0668	rpoC	rpoC M672L	RIFAMPICIN	DNA-directed RNA polymerase subunit beta\'
15798	Rifampicin mono-resistant	East-African-Indian	+	764407	G<->C	AGG<->AGC	R346S	Rv0668	rpoC	rpoC R346S	RIFAMPICIN	DNA-directed RNA polymerase subunit beta\'
15798	Rifampicin mono-resistant	East-African-Indian	+	764040	G<->C	AGC<->ACC	S224T	Rv0668	rpoC	rpoC S224T	RIFAMPICIN	DNA-directed RNA polymerase subunit beta\'
13412	Rifampicin mono-resistant	East-African-Indian	+	765875	G<->A	GTC<->ATC	V836I	Rv0668	rpoC	rpoC V836I	RIFAMPICIN	DNA-directed RNA polymerase subunit beta\'
15798	Rifampicin mono-resistant	East-African-Indian	+	765533	T<->C	TAC<->CAC	Y722H	Rv0668	rpoC	rpoC Y722H	RIFAMPICIN	DNA-directed RNA polymerase subunit beta\'
PU-54	Pre-XDR	Indo-Oceanic	+	761491	T<->C	GTG<->GCG	V562A	Rv0667	rpoB	rpoB V562A	RIFAMPICIN	DNA-directed RNA polymerase subunit beta
16485	Pre-XDR	East-African-Indian	+	763501	C<->A	GAC<->GAA	D44E	Rv0668	rpoC	rpoC D44E	RIFAMPICIN	DNA-directed RNA polymerase subunit beta\'
16485	Pre-XDR	East-African-Indian	+	764461	A<->C	GAA<->GAC	E364D	Rv0668	rpoC	rpoC E364D	RIFAMPICIN	DNA-directed RNA polymerase subunit beta\'
16485	Pre-XDR	East-African-Indian	+	764513	T<->A	TTC<->ATC	F382I	Rv0668	rpoC	rpoC F382I	RIFAMPICIN	DNA-directed RNA polymerase subunit beta\'
16485	Pre-XDR	East-African-Indian	+	764441	A<->C	ATC<->CTC	I358L	Rv0668	rpoC	rpoC I358L	RIFAMPICIN	DNA-directed RNA polymerase subunit beta\'
16485	Pre-XDR	East-African-Indian	+	764471	A<->C	AAC<->CAC	N368H	Rv0668	rpoC	rpoC N368H	RIFAMPICIN	DNA-directed RNA polymerase subunit beta\'
16485	Pre-XDR	East-African-Indian	+	764473	C<->G	AAC<->AAG	N368K	Rv0668	rpoC	rpoC N368K	RIFAMPICIN	DNA-directed RNA polymerase subunit beta\'
16485	Pre-XDR	East-African-Indian	+	764498	T<->G	TCC<->GCC	S377A	Rv0668	rpoC	rpoC S377A	RIFAMPICIN	DNA-directed RNA polymerase subunit beta\'
13011	Sensitive to first line drugs	East-African-Indian	+	760407	A<->G	AGC<->GGC	S201G	Rv0667	rpoB	rpoB S201G	RIFAMPICIN	DNA-directed RNA polymerase subunit beta
13011	Sensitive to first line drugs	East-African-Indian	+	760567	C<->G	TCG<->TGG	S254W	Rv0667	rpoB	rpoB S254W	RIFAMPICIN	DNA-directed RNA polymerase subunit beta
13011	Sensitive to first line drugs	East-African-Indian	+	760591	T<->C	GTC<->GCC	V262A	Rv0667	rpoB	rpoB V262A	RIFAMPICIN	DNA-directed RNA polymerase subunit beta
13011	Sensitive to first line drugs	East-African-Indian	+	764844	C<->G	GCC<->GGC	A492G	Rv0668	rpoC	rpoC A492G	RIFAMPICIN	DNA-directed RNA polymerase subunit beta\'
13011	Sensitive to first line drugs	East-African-Indian	+	766167	C<->A	GCC<->GAC	A933D	Rv0668	rpoC	rpoC A933D	RIFAMPICIN	DNA-directed RNA polymerase subunit beta\'
13011	Sensitive to first line drugs	East-African-Indian	+	766164	A<->C	GAG<->GCG	E932A	Rv0668	rpoC	rpoC E932A	RIFAMPICIN	DNA-directed RNA polymerase subunit beta\'
13011	Sensitive to first line drugs	East-African-Indian	+	766165	G<->C	GAG<->GAC	E932D	Rv0668	rpoC	rpoC E932D	RIFAMPICIN	DNA-directed RNA polymerase subunit beta\'
13011	Sensitive to first line drugs	East-African-Indian	+	766494	G<->A	GGC<->GAC	G1042D	Rv0668	rpoC	rpoC G1042D	RIFAMPICIN	DNA-directed RNA polymerase subunit beta\'
13011	Sensitive to first line drugs	East-African-Indian	+	765408	G<->C	GGT<->GCT	G680A	Rv0668	rpoC	rpoC G680A	RIFAMPICIN	DNA-directed RNA polymerase subunit beta\'
13011	Sensitive to first line drugs	East-African-Indian	+	766034	C<->A	CAC<->AAC	H889N	Rv0668	rpoC	rpoC H889N	RIFAMPICIN	DNA-directed RNA polymerase subunit beta\'
13011	Sensitive to first line drugs	East-African-Indian	+	766035	A<->C	CAC<->CCC	H889P	Rv0668	rpoC	rpoC H889P	RIFAMPICIN	DNA-directed RNA polymerase subunit beta\'
13011	Sensitive to first line drugs	East-African-Indian	+	765425	A<->G	AAG<->GAG	K686E	Rv0668	rpoC	rpoC K686E	RIFAMPICIN	DNA-directed RNA polymerase subunit beta\'
13011	Sensitive to first line drugs	East-African-Indian	+	765405	T<->A	CTG<->CAG	L679Q	Rv0668	rpoC	rpoC L679Q	RIFAMPICIN	DNA-directed RNA polymerase subunit beta\'
P-19	Sensitive to first line drugs	Euro-American (H37Rv-like)	+	763644	T<->C	ATG<->ACG	M92T	Rv0668	rpoC	rpoC M92T	RIFAMPICIN	DNA-directed RNA polymerase subunit beta\'
13011	Sensitive to first line drugs	East-African-Indian	+	766195	A<->C	CAA<->CAC	Q942H	Rv0668	rpoC	rpoC Q942H	RIFAMPICIN	DNA-directed RNA polymerase subunit beta\'
13011	Sensitive to first line drugs	East-African-Indian	+	764040	G<->C	AGC<->ACC	S224T	Rv0668	rpoC	rpoC S224T	RIFAMPICIN	DNA-directed RNA polymerase subunit beta\'
13011	Sensitive to first line drugs	East-African-Indian	+	766484	G<->A	GTA<->ATA	V1039I	Rv0668	rpoC	rpoC V1039I	RIFAMPICIN	DNA-directed RNA polymerase subunit beta\'
13011	Sensitive to first line drugs	East-African-Indian	+	765875	G<->A	GTC<->ATC	V836I	Rv0668	rpoC	rpoC V836I	RIFAMPICIN	DNA-directed RNA polymerase subunit beta\'
14509	Isoniazid mono-resistant	Indo-Oceanic	-	4407976	C<->T	GGC<->GAC	G76D	Rv3919c	gid	gid G76D	STREPTOMYCIN	rRNA small subunit methyltransferase G
11867	Isoniazid mono-resistant	East-African-Indian	-	4408141	C<->G	CGG<->CCG	R21P	Rv3919c	gid	gid R21P	STREPTOMYCIN	rRNA small subunit methyltransferase G
12058	MDR	East-African-Indian	-	4407734	C<->A	GGG<->TGG	G157W	Rv3919c	gid	gid G157W	STREPTOMYCIN	rRNA small subunit methyltransferase G
13679	MDR	East-African-Indian	-	4407716	T<->G	AAA<->CAA	K163Q	Rv3919c	gid	gid K163Q	STREPTOMYCIN	rRNA small subunit methyltransferase G
13977	MDR	East-Asian (Beijing)	-	4407620	A<->G	TAT<->CAT	Y195H	Rv3919c	gid	gid Y195H	STREPTOMYCIN	rRNA small subunit methyltransferase G
14298	MDR	East-Asian (Beijing)	-	4407620	A<->G	TAT<->CAT	Y195H	Rv3919c	gid	gid Y195H	STREPTOMYCIN	rRNA small subunit methyltransferase G
14032	MDR	East-African-Indian	+	781796	G<->C	ATG<->ATC	M79I	Rv0682	rpsL	rpsL M79I	STREPTOMYCIN	30S ribosomal protein S12
PU-169	MDR	East-African-Indian	-	4408047	G<->T	TGC<->TGA	C52*	Rv3919c	gid	gid C52*	STREPTOMYCIN	rRNA small subunit methyltransferase G
12067	MDR	Indo-Oceanic	-	4407976	C<->T	GGC<->GAC	G76D	Rv3919c	gid	gid G76D	STREPTOMYCIN	rRNA small subunit methyltransferase G
14183	MDR	Indo-Oceanic	-	4407976	C<->T	GGC<->GAC	G76D	Rv3919c	gid	gid G76D	STREPTOMYCIN	rRNA small subunit methyltransferase G
14845	MDR	East-African-Indian	-	4408141	C<->G	CGG<->CCG	R21P	Rv3919c	gid	gid R21P	STREPTOMYCIN	rRNA small subunit methyltransferase G
16056	MDR	East-African-Indian	-	4407913	C<->A	CGC<->CTC	R97L	Rv3919c	gid	gid R97L	STREPTOMYCIN	rRNA small subunit methyltransferase G
P-18	MDR	East-African-Indian	-	4407758	T<->G	AGC<->CGC	S149R	Rv3919c	gid	gid S149R	STREPTOMYCIN	rRNA small subunit methyltransferase G
13661	MDR	East-African-Indian	+	781771	G<->A	GGC<->GAC	G71D	Rv0682	rpsL	rpsL G71D	STREPTOMYCIN	30S ribosomal protein S12
P-9	MDR	Indo-Oceanic	-	4407964	G<->A	GCG<->GTG	A80V	Rv3919c	gid	gid A80V	STREPTOMYCIN	rRNA small subunit methyltransferase G
14075	MDR	Indo-Oceanic	-	4407976	C<->T	GGC<->GAC	G76D	Rv3919c	gid	gid G76D	STREPTOMYCIN	rRNA small subunit methyltransferase G
15437	MDR	East-African-Indian	-	4407977	C<->T	GGC<->AGC	G76S	Rv3919c	gid	gid G76S	STREPTOMYCIN	rRNA small subunit methyltransferase G
15453	MDR	East-African-Indian	-	4407919	A<->G	CTG<->CCG	L95P	Rv3919c	gid	gid L95P	STREPTOMYCIN	rRNA small subunit methyltransferase G
16028	MDR	Indo-Oceanic	-	4408048	C<->T	TGC<->TAC	C52Y	Rv3919c	gid	gid C52Y	STREPTOMYCIN	rRNA small subunit methyltransferase G
13668	MDR	Indo-Oceanic	-	4407853	C<->A	GGG<->GTG	G117V	Rv3919c	gid	gid G117V	STREPTOMYCIN	rRNA small subunit methyltransferase G
16340	Rifampicin mono-resistant	Indo-Oceanic	-	4407848	C<->T	GCC<->ACC	A119T	Rv3919c	gid	gid A119T	STREPTOMYCIN	rRNA small subunit methyltransferase G
16340	Rifampicin mono-resistant	Indo-Oceanic	-	4407715	T<->G	AAA<->ACA	K163T	Rv3919c	gid	gid K163T	STREPTOMYCIN	rRNA small subunit methyltransferase G
12649	Rifampicin mono-resistant	East-African-Indian	-	4407724	A<->T	CTC<->CAC	L160H	Rv3919c	gid	gid L160H	STREPTOMYCIN	rRNA small subunit methyltransferase G
PU-54	Pre-XDR	Indo-Oceanic	-	4408180	G<->A	GCG<->GTG	A8V	Rv3919c	gid	gid A8V	STREPTOMYCIN	rRNA small subunit methyltransferase G
13011	Sensitive to first line drugs	East-African-Indian	+	781608	A<->G	AGT<->GGT	S17G	Rv0682	rpsL	rpsL S17G	STREPTOMYCIN	30S ribosomal protein S12
13011	Sensitive to first line drugs	East-African-Indian	+	781609	G<->C	AGT<->ACT	S17T	Rv0682	rpsL	rpsL S17T	STREPTOMYCIN	30S ribosomal protein S12
